# Supplementary material
Source: Springer Nature journal article supplement (https://www.springermedizin.de/resource/supplementary/13045_2013_347_MOESM1_ESM.pdf/9661170)

### Homo sapiens PD-1 2q37.3

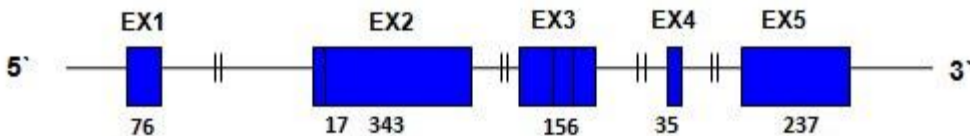

### Homo sapiens PD-L1 9p24

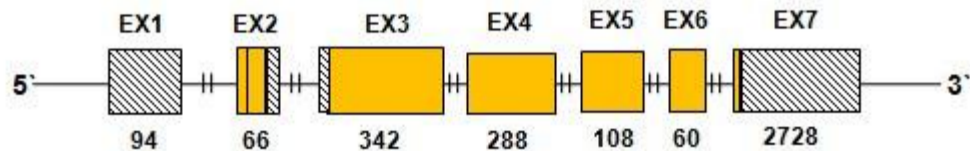

Supplement: MOESM1 [file 9661170]
